# Supplementary material for: Viral and Host Characteristics of Recent and Established HIV-1 Infections in Kisumu based on a Multiassay Approach
Source: PubMed Central journal article supplement (PMC5126579; doi:10.1038/srep37964), 2016-11-29
Supplement: srep37964-s1.pdf [file srep37964-s1.pdf]

**Title:** Viral and Host Characteristics of Recent and Established HIV-1 Infections in Kisumu based on a Multiassay Approach

**Authors:** Newton Otecko<sup>1</sup>, Seth Inzaule<sup>1</sup>, Collins Odhiambo<sup>1</sup>, George Otieno<sup>1</sup>, Valarie Opollo<sup>1</sup>, Alex Morwabe<sup>1</sup>, Kennedy Were<sup>1</sup>, Kenneth Ndiege<sup>1</sup>, Fredrick Otieno<sup>1</sup>, Andrea A. Kim<sup>2</sup>, Clement Zeh<sup>2\*</sup>

**Institutional Affiliations:**

<sup>1</sup>Kenya Medical Research Institute/U.S. CDC Research and Public Health Collaboration (KEMRI/CDC) and KEMRI Center for Global Health Research, Kisumu, Kenya

<sup>2</sup>U.S. Centers for Disease Control and Prevention (CDC-Kenya, Division of HIV/AIDS Prevention) and the KEMRI/CDC Research and Public Health Collaboration, Kisumu,

**\*Corresponding Author**

Clement Zeh, PhD, MPH,

CDC – Ethiopia, U.S. Embassy

P.O. Box 1014 - Entoto Road

Addis Ababa, Ethiopia

Email: [cbz2@cdc.gov](mailto:cbz2@cdc.gov)

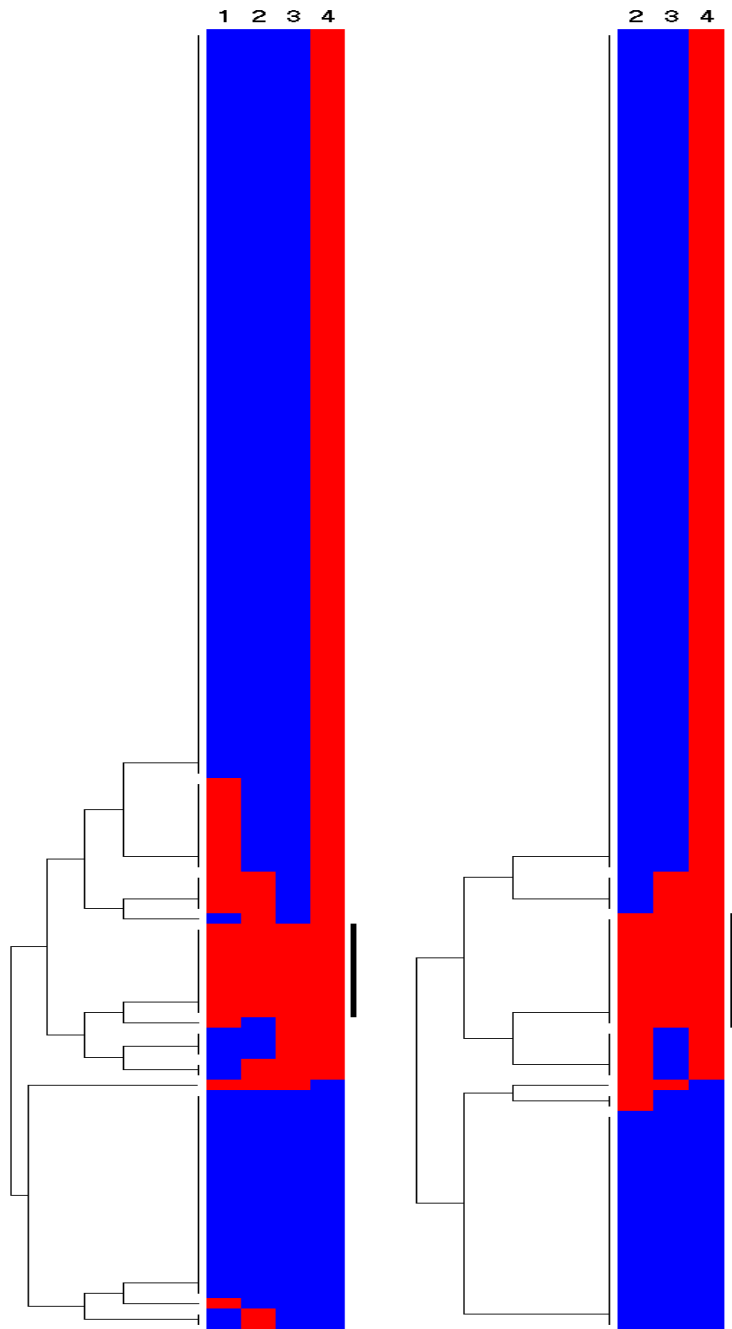

**Supplementary Figure S1:** Heat maps plotted for four (left) and three (right) assays used in testing for recent infections among HIV positive samples (N=125). Column numbers, 1: Biorad (AI<30%), 2: BED\_CEIA (OD-n<0.8), 3: LAg avidity (OD-n<1.5), 4: viral load copies/mL (>1000). Red colour indicates positive (within cut-off) and Blue

colour negative (outside cut-off) for each parameter. Black bars on the right margins of the maps represent clusters classified as recent HIV infections.

**Supplementary Table S1:** Cross-tabulation of recent and established infections based on BED-CEIA and Limiting antigen (LAg) avidity assays, Kisumu Incidence Cohort Study (KICoS): 2007-2009

|          |             | LAg avidity assay |             | Total |
|----------|-------------|-------------------|-------------|-------|
|          |             | Recent            | Established |       |
| BED-CEIA | Recent      | 12                | 7           | 19    |
|          | Established | 4                 | 102         | 106   |
| Total    |             | 16                | 109         | 125   |

Note: BED-CEIA versus LAg avidity: Kappa score = 0.635 (P = 0.001, 95% CI: 0.429-0.841), Pearson's phi coefficient ( $\phi$ ) = 0.638 (P = 0.001).

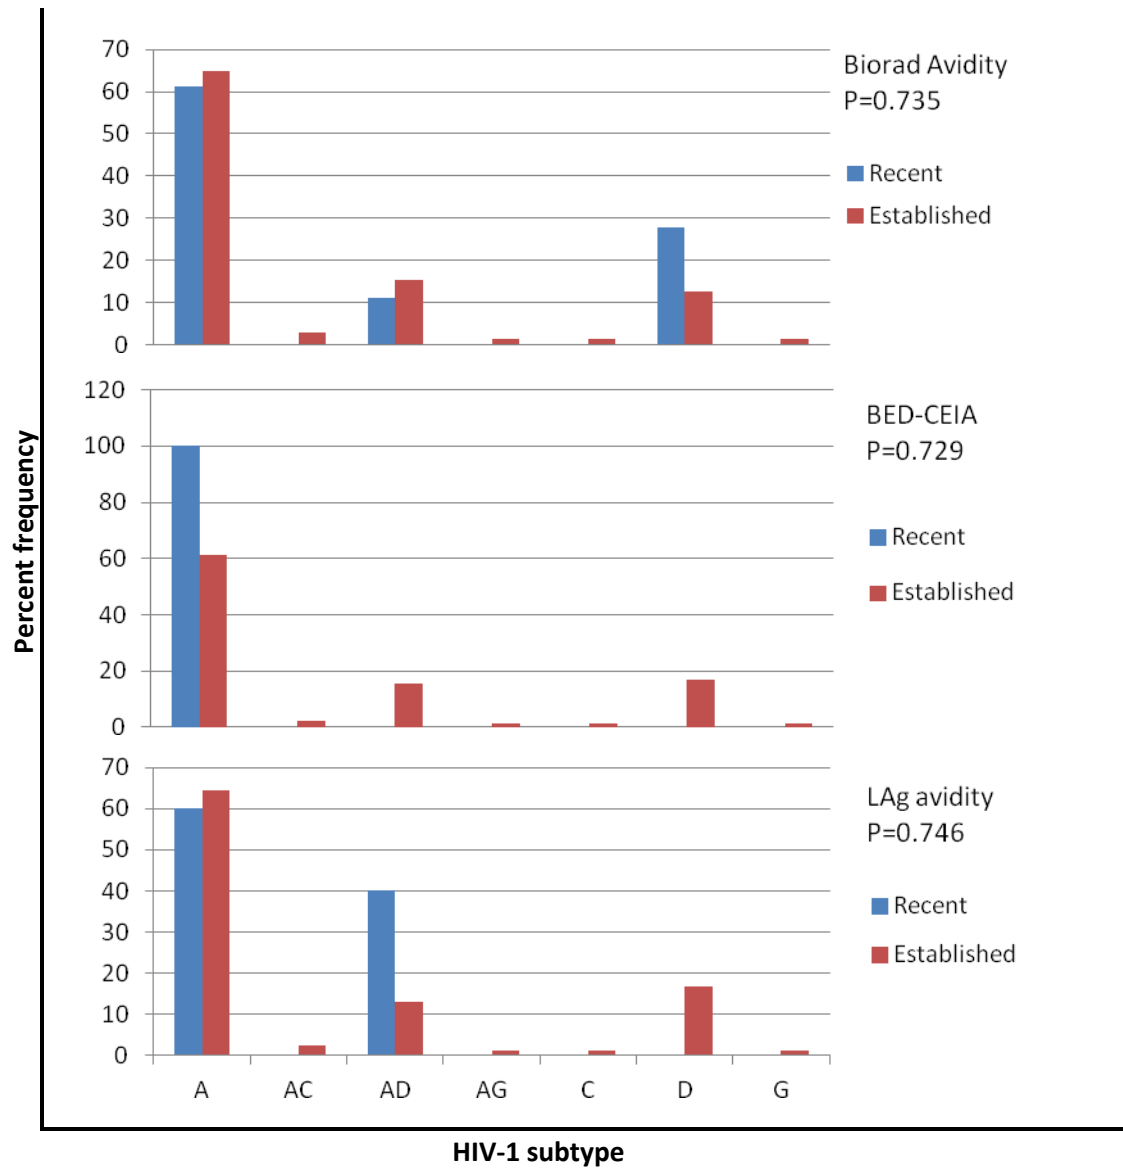

**Supplementary Figure S2:** HIV-1 subtypes of 89 of the 114 individuals classified as established having genotyping results. Bar graphs show percent subtype frequencies (Chi-square p-values indicated) among samples that would be termed recent and established infections as per Biorad avidity (top), BED-CEIA (middle) and LAg avidity (bottom) incidence assays.

**Supplementary Table S2:** General characteristics of HIV recent infections, Kisumu  
Incidence Cohort Study (KICoS): 2007-2009

| Participant | HIV subtype | Viral load | Gender | Age | marital            | Highest education |
|-------------|-------------|------------|--------|-----|--------------------|-------------------|
| 1           | C           | 4004       | female | 27  | single             | College           |
| 2           | AD          | 88660      | male   | 20  | single             | College           |
| 3           | A           | 512600     | female | 22  | single             | College           |
| 4           | C           | 686400     | male   | 27  | single             | nr*               |
| 5           | D           | 376200     | female | 22  | married            | Primary           |
| 6           | A           | 194700     | male   | 24  | separated/divorced | nr                |
| 7           | A           | 86240      | female | 28  | married            | Secondary         |
| 8           | A           | 17930      | female | 20  | single             | Secondary         |
| 9           | AD          | 9482       | female | 21  | single             | Primary           |
| 10          | A           | 278300     | male   | 30  | single             | Primary           |
| 11          | A           | 187000     | female | 16  | single             | Secondary         |

\*no response. viral load in copies/mL.

**Supplementary Table S3:** Factors potentially associated with recent HIV infections as compared to persons with established infections, Kisumu Incidence Cohort Study (KICoS): 2007-2009

| Characteristic              | Bivariate                |         | Multivariate      |         |
|-----------------------------|--------------------------|---------|-------------------|---------|
|                             | OR <sup>‡</sup> (95% CI) | p-value | OR (95% CI)       | p-value |
| <b>Gender</b>               |                          |         |                   |         |
| Male                        | 1                        |         | 1                 |         |
| Female                      | 0.62 (0.17-2.29)         | 0.478   | 3.49 (0.38-31.95) | 0.268   |
| <b>Age</b>                  |                          |         |                   |         |
| 24-34                       | 1                        |         | 1                 |         |
| 16-23                       | 0.97 (0.28-3.37)         | 0.964   | 0.45 (0.07-2.79)  | 0.389   |
| <b>Ever attended school</b> |                          |         |                   |         |
| No                          | 1                        |         | 1                 |         |
| Yes                         | 0.40 (0.07-2.24)         | 0.300   | 0.82 (0.07-10.20) | 0.879   |
| <b>Sex for gifts</b>        |                          |         |                   |         |
| No                          | 1                        |         | 1                 |         |
| Yes                         | 0.55 (0.07-4.60)         | 0.581   | 1.06 (0.09-12.11) | 0.962   |
| <b>Ever treated for STI</b> |                          |         |                   |         |
| No                          | 1                        |         | 1                 |         |
| Yes                         | 3.09 (0.87 – 10.90)      |         | 9.91 (1.55-63.46) | 0.015   |
| <b>Syphilis test result</b> |                          |         |                   |         |
| Negative                    | 1                        |         | 1                 |         |
| Positive                    | 4.84 (0.82-28.59)        | 0.081   | 7.67 (0.78-75.82) | 0.081   |

HSV-2

|               |                  |       |                  |       |
|---------------|------------------|-------|------------------|-------|
| Negative      | 1                |       | 1                |       |
| Positive      | 0.35 (0.86-1.41) | 0.139 | 0.27 (0.03-2.53) | 0.252 |
| Indeterminate | 0.85 (0.14-5.28) | 0.858 | 0.43 (0.02-8.71) | 0.585 |

---

<sup>¥</sup>Odds ratios with 95% confidence intervals (CI). \* Separated/divorce/widowed.

**Supplementary Table S4:** Characteristics of individuals belonging to HIV transmission clusters, LAg avidity, Kisumu Incidence Cohort Study (KICoS): 2007-2009

| Variable                     | Dyad 1       |              | Dyad 2       |              |
|------------------------------|--------------|--------------|--------------|--------------|
|                              | Individual 1 | Individual 2 | Individual 1 | Individual 2 |
| Viral load (copies/mL)       | 5269         | 56320        | 305800       | 1276000      |
| HIV subtype                  | A            | A            | AD           | AD           |
| Gender                       | Female       | Male         | Female       | Male         |
| Age                          | 26           | 32           | 22           | 28           |
| Education                    | Primary      | Primary      | Primary      | Secondary    |
| Marital status               | Married      | Married      | Single       | Single       |
| Partners $\leq$ 3 months (n) | 3            | 1            | 1            | 1            |
| Past STIs treatment          | No           | No           | Yes          | Yes          |
| Syphilis                     | Negative     | Positive     | Negative     | Negative     |
| HSV-2                        | Positive     | Positive     | Positive     | Positive     |
| Condom use                   | Yes          | No           | Yes          | No           |
